# Supplementary material
Source: PubMed Central journal article supplement (PMC3032074)
Supplement: mmc1.pdf [file mmc1.pdf]

## Supplemental Data

### Loss-of-Function Mutations in HPSE2

#### Cause the Autosomal Recessive Urofacial Syndrome

Junfeng Pang, Shu Zhang, Ping Yang, Bobbilynn Hawkins-Lee, Jixin Zhong, Yushan Zhang, Bernardo Ochoa, Jose A.G. Agundez, Marie-Antoinette Voelckel, Willie Reardon, Richard B. Fisher, Weikuan Gu, Wen-Cheng Xiong, Lin Mei, Jin-Xiong She, and Cong-Yi Wang

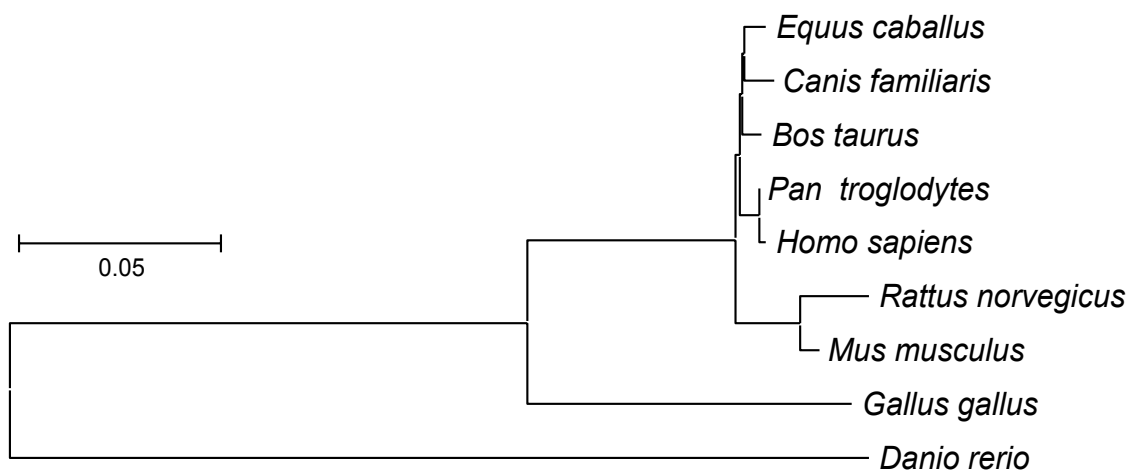

**Figure S1. A Phylogenetic Tree Showing the Revolutionary Relationships of the *HPSE2* Gene between Different Species**

The phylogenetic tree was generated using MEGA4.0 (Tamura, 2007) with p-distance model and constructed according to the calculation of the best match for the selected sequences. The distances for the tree branches are indicated in unit length as shown within the figure.

Tamura K, Dudley J, Nei M & Kumar S (2007) MEGA4: Molecular Evolutionary Genetics Analysis (MEGA) software version 4.0. *Molecular Biology and Evolution* 24: 1596-1599

|                   |                      |                       |                |                |         |       |              |    |
|-------------------|----------------------|-----------------------|----------------|----------------|---------|-------|--------------|----|
| Homo sapiens      | MRVLCAPPEAMPSSNSRPPA | CLAPGALYLALLLHLSLSSQ  | AGDRRPLPVDRAA  | GLKEKTLILLD    | VSTKPNV | RTVNE | 76           |    |
| Pan troglodytes   | MRVLCAPPEAMPSSNSRPPA | CLAPGALYLALLLHLSLSSQ  | AGDRRPLPVDRAA  | GLKEKTLILLD    | VSTKPNV | RTVNE | 76           |    |
| Canis familiaris  | MRVLCAPPEAMPSSNSRPPA | CLAPVFLALLFLHLSFSSQ   | QVDRRPLPVDRA   | PGLKEKTLILLD   | VSTKPNV | RTVNE | 76           |    |
| Equus caballus    | MRVLCAPPEAMPSSNSRPPA | CLTVPVFLALLFLHLSLSSQ  | AGDRRPLPVDV    | VPGLKEKTLILLD  | VSTKPNV | RTVNE | 76           |    |
| Bos taurus        | MRVLCAPPEAMPSSNSRPPA | CLAPVFLALLFLHLSLSSQ   | AGDRRPLPVDRA   | PGLKEKTLILLD   | VSTKPNV | RTVNE | 76           |    |
| Mus musculus      | MRVLCAPPEAMPSSNSRPPA | CLALVALFLALLFLHLSLSSQ | AGDRRPLPVDRA   | TGLKEKTLILLD   | VSTKPNV | RTVNE | 76           |    |
| Rattus norvegicus | MRVLCAPPEAMPSSNSRPPA | CLALVALFLALLFLHLSLSSQ | AGDRRPLPVDRA   | TGLKEKTLILLD   | VSTKPNV | RTVNE | 76           |    |
| Gallus gallus     | .....MPC             | SICFPGLLALMA          | PLGALMATFSLFSQ | AGDRRALPVEKSP  | GVKGR   | TILLD | VNTRSPVRIISE | 66 |
| Danio rerio       | .....MP              | RQFFCP...VFGSS        | LWALITLQSLISS  | AVTYRRPVSGGKRQ | SFLERT  | LILLD | VNTRSPVKVLND | 63 |

|                   |                 |              |              |             |             |       |            |            |     |
|-------------------|-----------------|--------------|--------------|-------------|-------------|-------|------------|------------|-----|
| Homo sapiens      | NFLSLQLDPSIIHDG | WDLFSSKRLVTL | LARGLSPAFLRF | GGKRTDFLQFQ | NLRNPAKSRGG | PGPDY | YLKNEYDDIV | 152        |     |
| Pan troglodytes   | NFLSLQLDPSIIHDG | WDLFSSKRLVTL | LARGLSPAFLRF | GGKRTDFLQFQ | NLRNPAKSRGG | PGPDY | YLKNEYDDIV | 152        |     |
| Canis familiaris  | NFLSLQLDPSIIHDG | WDLFSSKRLVTL | LARGLSPAFLRF | GGKRTDFLQFQ | NLRNPAKSRGG | PGPDY | YLKNEYDDIV | 152        |     |
| Equus caballus    | NFLSLQLDPSIIHDG | WDLFSSKRLVTL | LARGLSPAFLRF | GGKRTDFLQFQ | NLRNPAKSRGG | PGPDY | YLKNEYDDIV | 152        |     |
| Bos taurus        | NFLSLQLDPSIIHDG | WDLFSSKRLVTL | LARGLSPAFLRF | GGKRTDFLQFQ | NLRNPAKSRGG | PGPDY | YLKNEYDDIV | 152        |     |
| Mus musculus      | NFLSLQLDPSIIHDG | WDLFSSKRLVTL | LARGLSPAFLRF | GGKRTDFLQFQ | NLRNPAKSRGG | PGPDY | YLKNEYDDIV | 152        |     |
| Rattus norvegicus | NFLSLQLDPSIIHDG | WDLFSSKRLVTL | LARGLSPAFLRF | GGKRTDFLQFQ | NLRNPAKSRGG | PGPDY | YLKNEYDDIV | 152        |     |
| Gallus gallus     | NFLSLQLDPSIIHDG | WDLFSSKRLVTL | LARGLSPAFLRF | GGKRTDFLQFQ | NLRNPAKSRGG | PGPDY | YLKNEYDDIV | 142        |     |
| Danio rerio       | NFLSLQLDPSIIHDG | WDLFSSKRLVTL | LARGLSPAYLRF | GGKRTDFLQFH | NLNLA       | KFRG  | .PGPDY     | YLKNEYDDIV | 138 |

|                   |            |           |              |           |             |       |                       |     |
|-------------------|------------|-----------|--------------|-----------|-------------|-------|-----------------------|-----|
| Homo sapiens      | RSDVALDKQK | GCKIAQHPD | VMLELQREKAAQ | MHLVLLKEQ | FSNTYSNLILT | ..... | ARSLDKLYNFADCSGL      | 219 |
| Pan troglodytes   | RSDVALDKQK | GCKIAQHPD | VMLELQREKAAQ | MHLVLLKEQ | FSNTYSNLILT | ..... | ARSLDKLYNFADCSGL      | 219 |
| Canis familiaris  | RSDVALDKQK | GCKIAQHPD | VMLELQREKAAQ | MHLVLLKEQ | FSNTYSNLILT | ..... | ARSLDKLYNFADCSGL      | 219 |
| Equus caballus    | RSDVALDKQK | GCKIAQHPD | VMLELQREKAAQ | MHLVLLKEQ | FSNTYSNLILT | ..... | ARSLDKLYNFADCSGL      | 219 |
| Bos taurus        | RSDVALDKQK | GCKIAQHPD | VMLELQREKAAQ | MHLVLLKEQ | FSNTYSNLILT | GKAF  | LCFFPARSLDKLYNFADCSGL | 228 |
| Mus musculus      | RSDVALDKQK | GCKIAQHPD | VMLELQREKAAQ | MHLVLLKEQ | FSNTYSNLILT | ..... | ARSLDKLYNFADCSGL      | 219 |
| Rattus norvegicus | RSDVALDKQK | GCKIAQHPD | VMLELQREKAAQ | MHLVLLKEQ | FSNTYSNLILT | ..... | ARSLDKLYNFADCSGL      | 219 |
| Gallus gallus     | RSDVALDKQK | GCKIAQHPD | VMLELQREKAAQ | MHLVLLKEQ | FSNTYSNLILT | ..... | ARSLDKLYNFADCSGL      | 209 |
| Danio rerio       | RSDVALDKQK | GCKIAQHPD | VMLELQREKAAQ | MHLVLLKEQ | FSNTYSNLILT | ..... | ARSLDKLYNFADCSGL      | 205 |

|                   |                  |              |               |         |            |        |          |      |     |
|-------------------|------------------|--------------|---------------|---------|------------|--------|----------|------|-----|
| Homo sapiens      | HLIFALNALRRNPNNS | WNSSALSLLKYS | SASKKYNISWELG | NEPNNYR | TMHGRAVNGS | QLGKDY | IQLKSLLP | PIRI | 295 |
| Pan troglodytes   | HLIFALNALRRNPNNS | WNSSALSLLKYS | SASKKYNISWELG | NEPNNYR | TMHGRAVNGS | QLGKDY | IQLKSLLP | PIRI | 295 |
| Canis familiaris  | HLIFALNALRRNPNNS | WNSSALSLLKYS | SASKKYNISWELG | NEPNNYR | TMHGRAVNGS | QLGKDY | IQLKSLLP | PIRI | 295 |
| Equus caballus    | HLIFALNALRRNPNNS | WNSSALSLLKYS | SASKKYNISWELG | NEPNNYR | TMHGRAVNGS | QLGKDY | IQLKSLLP | PIRI | 295 |
| Bos taurus        | HLIFALNALRRNPNNS | WNSSALSLLKYS | SASKKYNISWELG | NEPNNYR | TMHGRAVNGS | QLGKDY | IQLKSLLP | PIRI | 304 |
| Mus musculus      | HLIFALNALRRNPNNS | WNSSALSLLKYS | SASKKYNISWELG | NEPNNYR | TMHGRAVNGS | QLGKDY | IQLKSLLP | PIRI | 295 |
| Rattus norvegicus | HLIFALNALRRNPNNS | WNSSALSLLKYS | SASKKYNISWELG | NEPNNYR | TMHGRAVNGS | QLGKDY | IQLKSLLP | PIRI | 295 |
| Gallus gallus     | HLIFALNALRRNPNNS | WNSSALSLLKYS | SASKKYNISWELG | NEPNNYR | TMHGRAVNGS | QLGKDY | IQLKSLLP | PIRI | 285 |
| Danio rerio       | HLIFALNALRRNPNNS | WNSSALSLLKYS | SASKKYNISWELG | NEPNNYR | TMHGRAVNGS | QLGKDY | IQLKSLLP | PIRI | 281 |

|                   |               |             |             |            |           |          |         |       |     |
|-------------------|---------------|-------------|-------------|------------|-----------|----------|---------|-------|-----|
| Homo sapiens      | YSRASLYGPNIGR | PRKNVIALLDG | FMKVAGSTVDA | VWQHCYIDGR | VVKVMDFLK | TRLLDTLS | DQIRIKQ | VVNTY | 371 |
| Pan troglodytes   | YSRASLYGPNIGR | PRKNVIALLDG | FMKVAGSTVDA | VWQHCYIDGR | VVKVMDFLK | TRLLDTLS | DQIRIKQ | VVNTY | 371 |
| Canis familiaris  | YSRASLYGPNIGR | PRKNVIALLDG | FMKVAGSTVDA | VWQHCYIDGR | VVKVMDFLK | TRLLDTLS | DQIRIKQ | VVNTY | 371 |
| Equus caballus    | YSRASLYGPNIGR | PRKNVIALLDG | FMKVAGSTVDA | VWQHCYIDGR | VVKVMDFLK | TRLLDTLS | DQIRIKQ | VVNTY | 371 |
| Bos taurus        | YSRASLYGPNIGR | PRKNVIALLDG | FMKVAGSTVDA | VWQHCYIDGR | VVKVMDFLK | TRLLDTLS | DQIRIKQ | VVNTY | 380 |
| Mus musculus      | YSRASLYGPNIGR | PRKNVIALLDG | FMKVAGSTVDA | VWQHCYIDGR | VVKVMDFLK | TRLLDTLS | DQIRIKQ | VVNTY | 371 |
| Rattus norvegicus | YSRASLYGPNIGR | PRKNVIALLDG | FMKVAGSTVDA | VWQHCYIDGR | VVKVMDFLK | TRLLDTLS | DQIRIKQ | VVNTY | 371 |
| Gallus gallus     | YSRASLYGPNIGR | PRKNVIALLDG | FMKVAGSTVDA | VWQHCYIDGR | VVKVMDFLK | TRLLDTLS | DQIRIKQ | VVNTY | 361 |
| Danio rerio       | YSRASLYGPNIGR | PRKNVIALLDG | FMKVAGSTVDA | VWQHCYIDGR | VVKVMDFLK | TRLLDTLS | DQIRIKQ | VVNTY | 357 |

|                   |              |            |            |            |          |           |          |         |        |       |     |
|-------------------|--------------|------------|------------|------------|----------|-----------|----------|---------|--------|-------|-----|
| Homo sapiens      | TPGKKIWLEGVV | TTSAGGTNNL | SDSYAAGFLW | LNTLGMLANQ | GIDVVRHS | FFDHGYNH  | LVQDNFN  | NPLPDY  | WLSLL  | 447   |     |
| Pan troglodytes   | TPGKKIWLEGVV | TTSAGGTNNL | SDSYAAGFLW | LNTLGMLANQ | GIDVVRHS | FFDHGYNH  | LVQDNFN  | NPLPDY  | WLSLL  | 447   |     |
| Canis familiaris  | TPGKKIWLEGVV | TTSAGGTNNL | SDSYAAGFLW | LNTLGMLANQ | GIDVVRHS | FFDHGYNH  | LVQDNFN  | NPLPDY  | WLSLL  | 447   |     |
| Equus caballus    | TPGKKIWLEGVV | TTSAGGTNNL | SDSYAAGFLW | LNTLGMLANQ | GIDVVRHS | FFDHGYNH  | LVQDNFN  | NPLPDY  | WLSLL  | 447   |     |
| Bos taurus        | TPGKKIWLEGVV | TTSAGGTNNL | SDSYAAGFLW | LNTLGMLANQ | GIDVVRHS | FFDHGYNH  | LVQDNFN  | NPLPDY  | WLSLL  | 456   |     |
| Mus musculus      | TPGKKIWLEGVV | TTSAGGTNNL | SDSYAAGFLW | LNTLGMLANQ | GIDVVRHS | FFDHGYNH  | LVQDNFN  | NPLPDY  | WLSLL  | 447   |     |
| Rattus norvegicus | TPGKKIWLEGVV | TTSAGGTNNL | SDSYAAGFLW | LNTLGMLANQ | GIDVVRHS | FFDHGYNH  | LVQDNFN  | NPLPDY  | WLSLL  | 447   |     |
| Gallus gallus     | TPGKKIWLEGVV | TTSAGGTNNL | SDSYAAGFLW | LNTLGMLANQ | GIDVVRHS | FFDHGYNH  | LVQDNFN  | NPLPDY  | WLSLL  | 437   |     |
| Danio rerio       | APFKH        | VWLVGGVPA  | WAGGTNNLSD | TFAGFLW    | LNTLGLAA | HGIDVVRHS | FFDYGYNH | LVQDNFN | NPLPDY | WLSLL | 433 |

|                   |              |          |          |          |        |         |         |       |        |          |          |          |     |
|-------------------|--------------|----------|----------|----------|--------|---------|---------|-------|--------|----------|----------|----------|-----|
| Homo sapiens      | YKRLIGPKVLAV | HVAGLQ   | RKPRPGRV | IRDKLR   | IYA    | ACTNHHN | NYVRS   | ITLFI | INLHRS | RKKIKLAG | TLRDKLVH | 523      |     |
| Pan troglodytes   | YKRLIGPKVLAV | HVAGLQ   | RKPRPGRV | IRDKLR   | IYA    | ACTNHHN | NYVRS   | ITLFI | INLHRS | RKKIKLAG | TLRDKLVH | 523      |     |
| Canis familiaris  | YKRLIGPKVLAV | HVAGLQ   | RKPRPGRV | IRDKLR   | IYA    | ACTNHHN | NYVRS   | ITLFI | INLHRS | RKKIKLAG | TLRDKLVH | 523      |     |
| Equus caballus    | YKRLIGPKVLAV | HVAGLQ   | RKPRPGRV | IRDKLR   | IYA    | ACTNHHN | NYVRS   | ITLFI | INLHRS | RKKIKLAG | TLRDKLVH | 523      |     |
| Bos taurus        | YKRLIGPKVLAV | HVAGLQ   | RKPRPGRV | IRDKLR   | IYA    | ACTNHHN | NYVRS   | ITLFI | INLHRS | RKKIKLAG | TLRDKLVH | 523      |     |
| Mus musculus      | YKRLIGPKVLAV | HVAGLQ   | RKPRPGRV | IRDKLR   | IYA    | ACTNHHN | NYVRS   | ITLFI | INLHRS | RKKIKLAG | TLRDKLVH | 523      |     |
| Rattus norvegicus | YKRLIGPKVLAV | HVAGLQ   | RKPRPGRV | IRDKLR   | IYA    | ACTNHHN | NYVRS   | ITLFI | INLHRS | RKKIKLAG | TLRDKLVH | 523      |     |
| Gallus gallus     | YKRLIGPKVLAV | HVAGLQ   | RKPRPGRV | IRDKLR   | IYA    | ACTNHHN | NYVRS   | ITLFI | INLHRS | RKKIKLAG | TLRDKLVH | 513      |     |
| Danio rerio       | FKHLV        | GPVAVLAV | HVAGLQ   | RKPRPGRV | IRDKLR | IYA     | ACTNHHN | NYVRS | ITLFI  | INLHRS   | RKKIKLAG | TLRDKLVH | 509 |

|                   |           |          |           |           |       |        |      |        |       |      |        |     |
|-------------------|-----------|----------|-----------|-----------|-------|--------|------|--------|-------|------|--------|-----|
| Homo sapiens      | QYLLQPYGQ | EGLKSKSV | QLNGQPLVM | VDDGTLPEL | KPRPR | LAGRTL | LVIP | PPVTMG | FVVKV | NVNA | LACRYR | 592 |
| Pan troglodytes   | QYLLQPYGQ | EGLKSKSV | QLNGQPLVM | VDDGTLPEL | KPRPR | LAGRTL | LVIP | PPVTMG | FVVKV | NVNA | LACRYR | 592 |
| Canis familiaris  | QYLLQPYGQ | EGLKSKSV | QLNGQPLVM | VDDGTLPEL | KPRPR | LAGRTL | LVIP | PPVTMG | FVVKV | NVNA | LACRYR | 592 |
| Equus caballus    | QYLLQPYGQ | EGLKSKSV | QLNGQPLVM | VDDGTLPEL | KPRPR | LAGRTL | LVIP | PPVTMG | FVVKV | NVNA | LACRYR | 592 |
| Bos taurus        | QYLLQPYGQ | EGLKSKSV | QLNGQPLVM | VDDGTLPEL | KPRPR | LAGRTL | LVIP | PPVTMG | FVVKV | NVNA | LACRYR | 601 |
| Mus musculus      | QYLLQPYGQ | EGLKSKSV | QLNGQPLVM | VDDGTLPEL | KPRPR | LAGRTL | LVIP | PPVTMG | FVVKV | NVNA | LACRYR | 592 |
| Rattus norvegicus | QYLLQPYGQ | EGLKSKSV | QLNGQPLVM | VDDGTLPEL | KPRPR | LAGRTL | LVIP | PPVTMG | FVVKV | NVNA | LACRYR | 592 |
| Gallus gallus     | QYLLQPYGQ | EGLKSKSV | QLNGQPLVM | VDDGTLPEL | KPRPR | LAGRTL | LVIP | PPVTMG | FVVKV | NVNA | LACRYR | 582 |
| Danio rerio       | QYLLQPYGQ | EGLKSKSV | QLNGQPLVM | VDDGTLPEL | KPRPR | LAGRTL | LVIP | PPVTMG | FVVKV | NVNA | LACRYR | 577 |

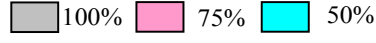

## Figure S2. HPSE2 Amino Acid Sequence Alignment Showing Evolutionary Conservation between Diverse Species

Amino acid sequence alignment was carried out using the DNAMAN 6.0 software (Lynnon Corporation). Genbank accession numbers for HPSE2 in each species are: *Danio rerio*, XP\_691045; *Gallus gallus*, XP\_421704; *Rattus norvegicus*, NP\_001129234; *Mus musculus*, NP\_001074726; *Homo sapiens*, NP\_068600; *Canis familiaris*, XP\_850311; *Bos taurus*, XP\_617505; *Equus caballus*, XP\_001501153; *Pan troglodytes*, XP\_001166372.

### Table S1. Primers Used for Mutation Screening for the *HPSE2* Gene

|                        |                                   |
|------------------------|-----------------------------------|
| <b>HPSE2exon1F:</b>    | 5'-CGG ACA GAC ACA CAC TTT AG -3' |
| <b>HPSE2exon1R:</b>    | 5'-AGT TTC TGA AAT GCC TTC TG -3' |
| <b>HPSE2exon2F:</b>    | 5'-CTT TAG CGC CGT GCT CGT AG -3' |
| <b>HPSE2exon2R:</b>    | 5'-ACA AAC ACA GCG GGT GCT TG -3' |
| <b>HPSE2exon3F:</b>    | 5'-GAT GTG TCA TGG AGT TGG AG -3' |
| <b>HPSE2exon3R:</b>    | 5'-TGA GAA GAA AAC ACA TGC TG -3' |
| <b>HPSE2exon4F:</b>    | 5'-TCC CGA CCT TAG GTG ATC TG -3' |
| <b>HPSE2exon4R:</b>    | 5'-AAA AGG CAG CTC AGG CTG TG -3' |
| <b>HPSE2exon5F:</b>    | 5'-AAA GGC AGA GAG ATC TGT GG -3' |
| <b>HPSE2exon5R:</b>    | 5'-AAC CCA TCC TAG AGA TTG TG -3' |
| <b>HPSE2exon6F:</b>    | 5'-GAT GTG TGG GGA GCT GGA AG -3' |
| <b>HPSE2exon6R:</b>    | 5'-AGC CTA TGG GAA AAC AGT GG -3' |
| <b>HPSE2exon7F:</b>    | 5'-CAT CAA TTC CAG CAA GTA AG -3' |
| <b>HPSE2exon7R:</b>    | 5'-CGC TTT AAA CCT TGA TAT GG -3' |
| <b>HPSE2exon8F:</b>    | 5'-CAT GGC TTT TAG GGA GTA CG -3' |
| <b>HPSE2exon8R:</b>    | 5'-AAT CTT TGC TCT GAT GCC TG -3' |
| <b>HPSE2exon9F:</b>    | 5'-TTA GGC TTA CAA ATG GCT AG -3' |
| <b>HPSE2exon9R:</b>    | 5'-GTG TTG AAG CCA AAA GTC TG -3' |
| <b>HPSE2exon10F:</b>   | 5'-TGA CTC CAG GTA GGA AGT GA -3' |
| <b>HPSE2exon10R:</b>   | 5'-CTC ATG GGC ATT ACA TCA AC -3' |
| <b>HPSE2exon11F:</b>   | 5'-ATG GCA GGA AGT GGC TAT CA -3' |
| <b>HPSE2exon11R:</b>   | 5'-GGC CAA GGA TGC TAA ACA GC -3' |
| <b>HPSE2exon12_1F:</b> | 5'-TCA AAC CCT GGA CCT CCA AG -3' |
| <b>HPSE2exon12_1R:</b> | 5'-GAG TGG AGG AGT GGA AGC AG -3' |
| <b>HPSE2exon12_2F:</b> | 5'-CTG CCG CTA CCG ATA AGC TA -3' |
| <b>HPSE2exon12_2R:</b> | 5'-CAT CAG CCG GGA AAT CAT AC -3' |
